# Supplementary material for: Zn(ii)-doped γ-Fe2O3 single-crystalline nanoplates with high phase-transition temperature, superparamagnetic property and good photocatalytic property
Source: Royal Society of Chemistry journal article supplement (doi:10.1039/c3ra43695k), 2013-01-01

## Supporting Information

**Zn(II)-doped  $\gamma$ -Fe<sub>2</sub>O<sub>3</sub> single-crystalline nanoplates with high phase-transition temperature, superparamagnetic property and good photocatalytic property**

*Shuang Yang, Yanyan Xu\*, Yanyan Cao, Guoying Zhang, Yaqiu Sun, Dongzhao Gao*

**Fig. S1** XPS fully scanned spectra of the as-obtained  $\gamma$ -Fe<sub>2</sub>O<sub>3</sub> nanoplates with 0.08g of Zn(Ac)<sub>2</sub> and calcined at 350 °C for 2 h.

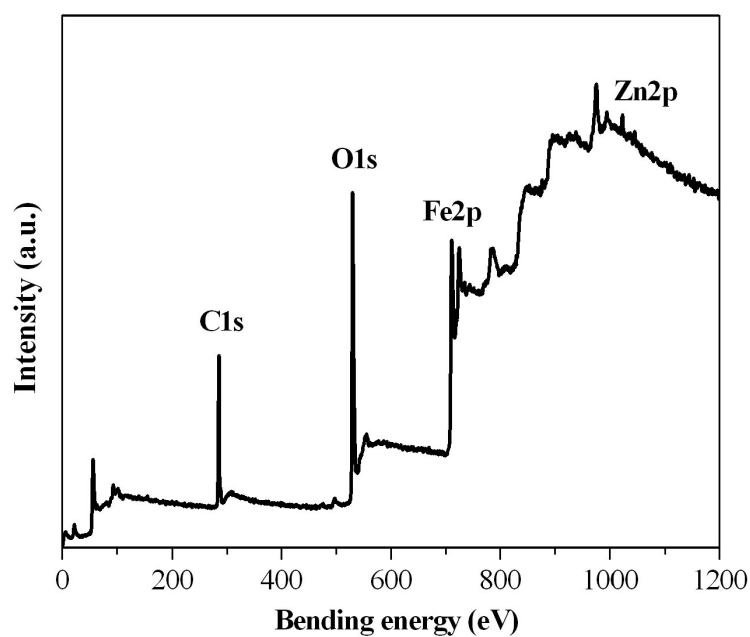

**Fig. S2** EDS spectrum of the as-obtained  $\gamma$ -Fe<sub>2</sub>O<sub>3</sub> nanoplates with 0.08g of Zn(Ac)<sub>2</sub> and calcined at 350 °C for 2 h..

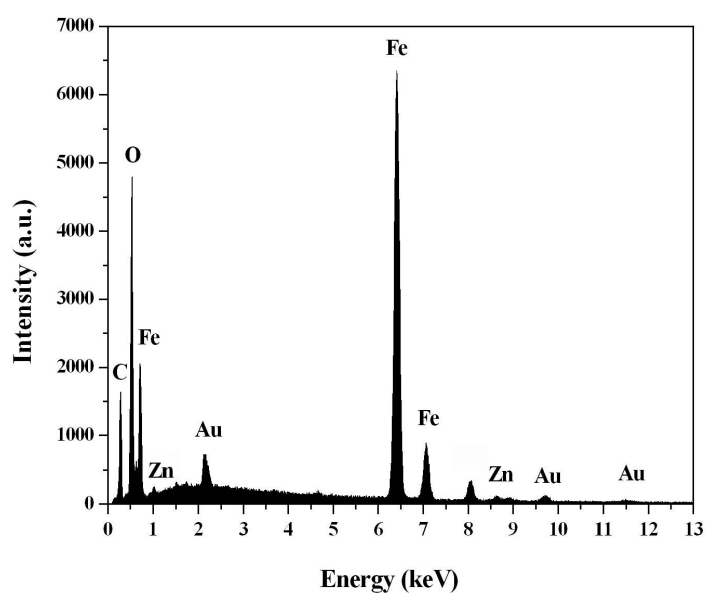

**Fig. S3** nitrogen adsorption-desorption isotherm of the precursor (a) and the  $\gamma$ -Fe<sub>2</sub>O<sub>3</sub> nanoplates

obtained by calcining the precursor at 350 °C for 2 h (b).

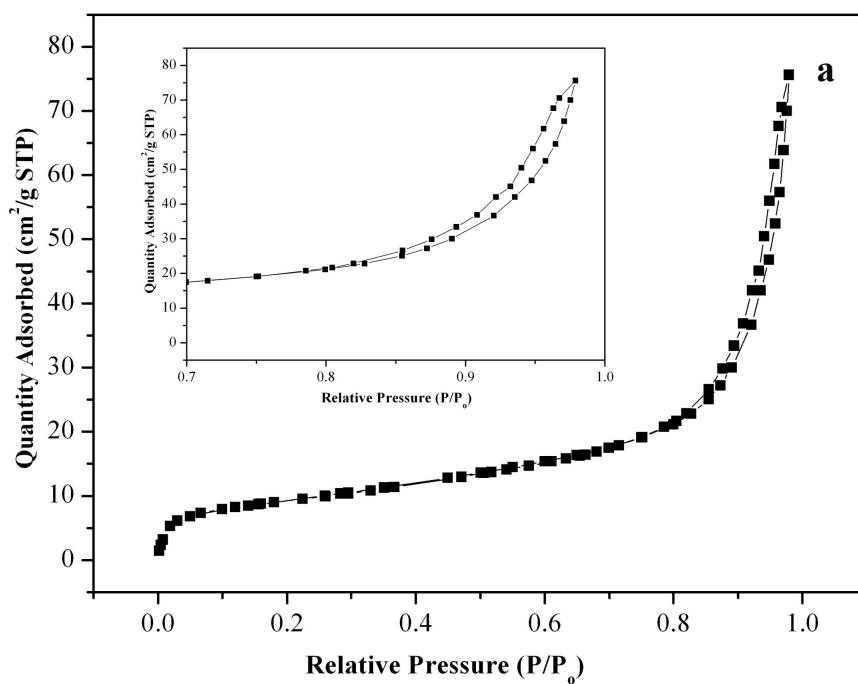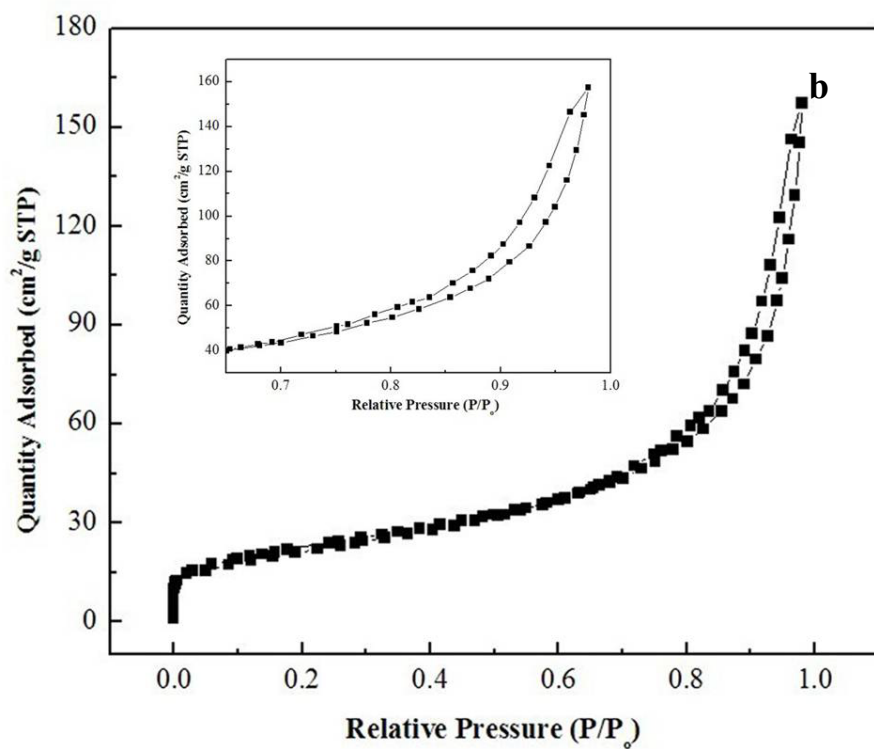

**Fig. S4** EDS spectrum of the  $\gamma$ -Fe<sub>2</sub>O<sub>3</sub> nanoplates obtained with different amount of Zn(Ac)<sub>2</sub> and calcined at 350 °C for 2 h: (a) 0.02g, (b) 0.12g..

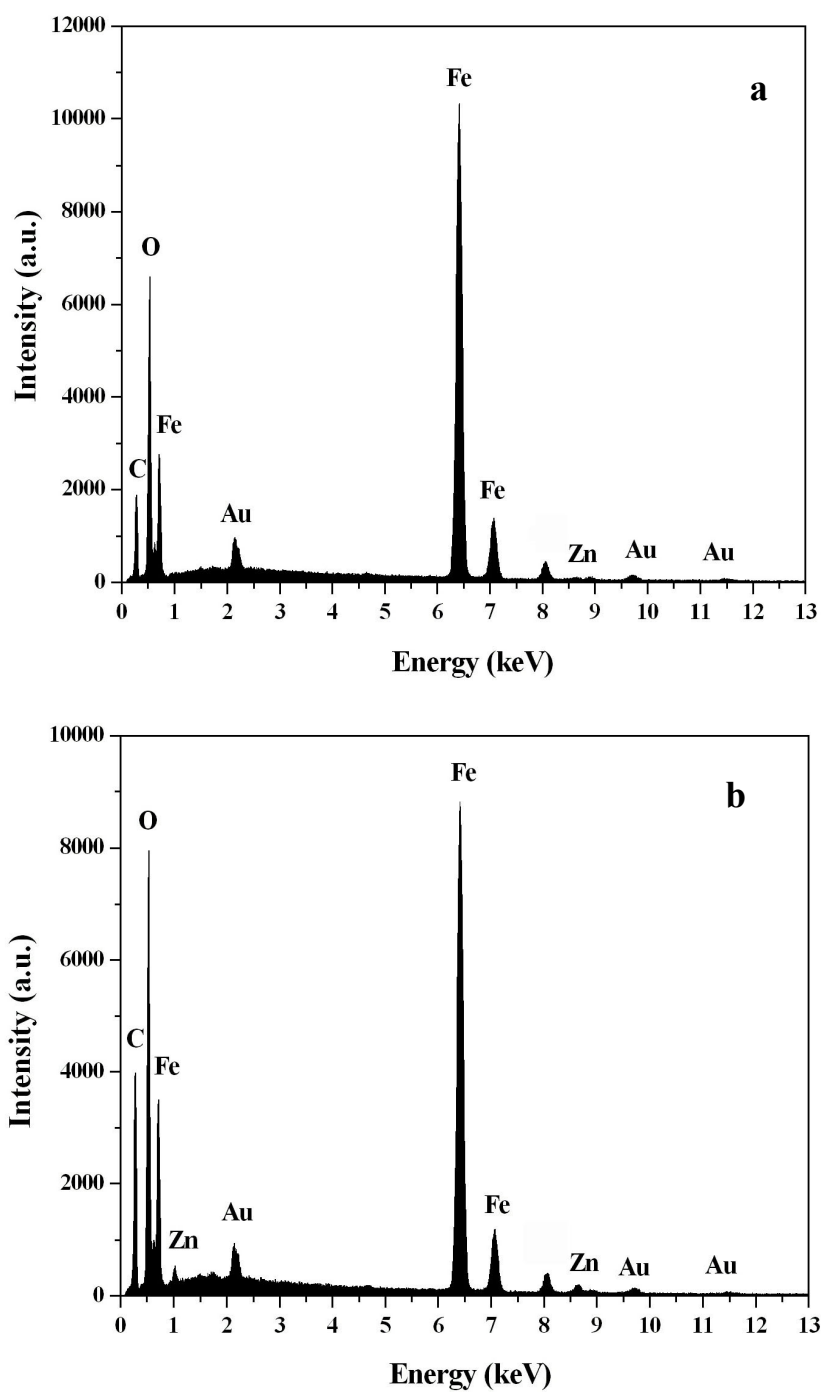

Supplement: c3ra43695k.pdf [file c3ra43695k.pdf]
